# Supplementary material for: An Engineered Rare Codon Device for Optimization of Metabolic Pathways
Source: PubMed Central journal article supplement (PMC4745014; doi:10.1038/srep20608), 2016-02-08
Supplement: srep20608-s1.pdf [file srep20608-s1.pdf]

## **An Engineered Rare Codon Device for Optimization of Metabolic Pathways**

You Wang<sup>1,2#</sup>, Chunying Li<sup>1,2#</sup>, Md. Rezaul Islam Khan<sup>1#</sup>, Yushu Wang<sup>1</sup>, Yunfeng Ruan<sup>1,2</sup>, Bin Zhao<sup>1,2</sup>, Bo Zhang<sup>1,2</sup>, Xiaopan Ma<sup>1,2</sup>, Kaisi Zhang<sup>1,2</sup>, Xiwen Zhao<sup>1,2</sup>, Guanhao Ye<sup>1,2</sup>, Xizhi Guo<sup>1</sup>, Guoyin Feng<sup>1</sup>, Lin He<sup>1,2,3\*</sup>, Gang Ma<sup>1,2\*</sup>

1 Bio-X institutes, Key Laboratory for the Genetics of Developmental and Neuropsychiatric Disorders (Ministry of Education), Shanghai Jiao Tong University, Shanghai 200240, PR China

2 2011 SJTU-BioX-Shanghai Team for The International Genetically Engineered Machine Competition (iGEM), Shanghai Jiao Tong University, Shanghai, PR China

3 Shanghai genomePilot Institutes for Genomics and Human Health, Shanghai, 200030, China

# These authors contributed equally to this work.

\* Corresponding authors.

Gang Ma: magang2004@gmail.com, Fax: 86-21-34207232

Lin He: helinhelin@gmail.com, Fax: 86-21-62932059

**Table S1. Primers used in this study**

| Primer name   | sequence (5' to 3')                                                                  |
|---------------|--------------------------------------------------------------------------------------|
| 2luc-NcoI-F   | <b>CCCCCATGG</b> CGAGGAGGGCGGCGGAAGACGCCAAAAACATAAAG                                 |
| 4luc-NcoI-F   | <b>CCCCCATGG</b> CGAGGAGGAGGAGGGCGGCGGAAGACGCCAAAAACATAAAG                           |
| 6luc-NcoI-F   | <b>CCCCCATGG</b> CGAGGAGGAGGAGGAGGGCGGCGGAAGACGCCAAAAACATAA<br>G                     |
| 8luc-NcoI-F   | <b>CCCCCATGG</b> CGAGGAGGAGGAGGAGGAGGAGGAGGGCGGCGGAAGACGCCAAAA<br>ACATAAAG           |
| luc-NdeI-R    | <b>CCCCCATATG</b> TTTACACGGCGATCTTTCC                                                |
| rfp - F       | <b>GGAATTCATATG</b> GCTTCCTCCGAAGACG                                                 |
| rfp - R       | <b>CCGCTCGAG</b> TTAAGCACCGGTGGAGTGAC                                                |
| 6rfp-F        | <b>GGAATTCATATG</b> AGGAGGAGGAGGAGGGCTTCCTCCGAAGACG                                  |
| ampR-F        | <u>CCTGTCGCTTGC</u> GGTATTCGGCGGCATCCGCTTACAGACA                                     |
| ampR-R        | <u>CAGTGAGCGAGGAAGCGGA</u> ACGCTCAGTGAACGAAAA                                        |
| 2blaluc-F     | <u>AATGCTTCAATAATATTGAAAAAGGAAGAGTATGAGGAGGAGGGAAGACGCCAAAAAC</u>                    |
| 4blaluc-F     | <u>AATGCTTCAATAATATTGAAAAAGGAAGAGTATGAGGAGGAGGAGGAGGGAAGACGC</u><br>CAAAAAAC         |
| 6blaluc-F     | <u>AATGCTTCAATAATATTGAAAAAGGAAGAGTATGAGGAGGAGGAGGAGGAGGGAAGA</u><br>CGCAAAAAAC       |
| 8blaluc-F     | <u>AATGCTTCAATAATATTGAAAAAGGAAGAGTATGAGGAGGAGGAGGAGGAGGAGGAG</u><br>GGAAGACGCCAAAAAC |
| LucAmp-R      | <u>ACGGGAGGGCTTACCATCTG</u> TTACACGGCGATCTTTCC                                       |
| trc-F         | <u>CCACCATACCCACGCCGAAACA</u> AAAAAGAGTTTGTAGAAACGC                                  |
| trc-R         | <u>TTGCCGTTACGCACCACCC</u> GGTATTTTCTCCTTACGCATCTGT                                  |
| argW-F        | <u>TTGTGAGCGGATAACAATTCACAC</u> GCCTCTTAGTTAAATGGATATAACGAG                          |
| argW-R        | <u>GTGGCAGCAGCCTAGGTTAAG</u> TCAACGATCTGAAGCGAACCAT                                  |
| aspV - F      | <u>CCACCATACCCACGCCGAAAC</u> CTAAAAATAGCGACTTGGGC                                    |
| aspV - R      | <u>TTGCCGTTACGCACCACCC</u> TTGAACAGAGAAATGGTGGAA                                     |
| T7-F          | <u>AGAATGAATCACCGATACGC</u> AGATCTCGATCCCGCGAA                                       |
| T7-R          | <u>CCTACGAGTTGCATGATAAAG</u> ACAAAAACCCCTCAAGACCC                                    |
| aspV-CCU-F    | AGTCGGTTAGAATACCTGCCT <b>CT</b> ACGCAGGGGGTTCGC                                      |
| aspV-CCU-R    | GCGACCCCTGCGT <b>AGG</b> AGGCAGGTATTCTAACCGACT                                       |
| TAGluc-NcoI-F | <b>CCCCCATGG</b> CGTAGAGGAGGGCGGCGGAAGACGCCAAAAACATAAAG                              |
| TDRS-F        | <b>CATGCC</b> ATGGGCGTTCTGCCGCTTACTCT                                                |
| TDRS-R        | <b>GGAATTCATATG</b> TCAGTTATTCTCAGCCTTCTTACA                                         |
| FB-argW-F     | <b>GGAATTCATATG</b> GAAAAATTATAAAAAACCCG                                             |
| FB-argW-R     | <b>CCGCTCGAG</b> GTCAACGATCTGAAGCG                                                   |

Note:

- underlined letters                      the homologous sequence used for overlap extension PCR
- blod letters**                              the restriction enzyme sites
- italic and blod letters*                the mutation points

**Table S2. Vectors used in this study**

| <b>Vector name</b>                | <b>Description</b>                                                                                                                                                |
|-----------------------------------|-------------------------------------------------------------------------------------------------------------------------------------------------------------------|
| <b>pET-T7-2AGGluc</b>             | luciferase gene with 2 AGG codons inserted after the second codon was inserted into pET28a between <i>NcoI</i> and <i>NdeI</i> under the T7 promoter              |
| <b>pET-T7-4AGGluc</b>             | luciferase gene with 4 AGG codons inserted after the second codon was inserted into pET28a between <i>NcoI</i> and <i>NdeI</i> under the T7 promoter              |
| <b>pET-T7-6AGGluc</b>             | luciferase gene with 6 AGG codons inserted after the second codon was inserted into pET28a between <i>NcoI</i> and <i>NdeI</i> under the T7 promoter              |
| <b>pET-T7-8AGGluc</b>             | luciferase gene with 8 AGG codons inserted after the second codon was inserted into pET28a between <i>NcoI</i> and <i>NdeI</i> under the T7 promoter              |
| <b>pET-ampR</b>                   | <i>ampR</i> operon from pUC18 was amplified and inserted into pET28a replacing a nonessential region                                                              |
| <b>pET-bla-4AGGluc</b>            | the ORF of luciferase gene inserted 4 AGG codons after initial codon replacing the ORF of <i>ampR</i> gene on pET-bla                                             |
| <b>pET-bla-6AGGluc</b>            | the ORF of luciferase gene inserted 6 AGG codons after initial codon replacing the ORF of <i>ampR</i> gene on pET-bla                                             |
| <b>pET-bla-8AGGluc</b>            | the ORF of luciferase gene inserted 8 AGG codons after initial codon replacing the ORF of <i>ampR</i> gene on pET-bla                                             |
| <b>pET-T7-RFP</b>                 | wild type RFP gene was inserted into pET28a between <i>NdeI</i> and <i>XhoI</i> under the T7 promoter                                                             |
| <b>pET-T7-6AGGRFP</b>             | RFP gene with 6 AGG codons inserted after initial codon was inserted into pET28a between <i>NdeI</i> and <i>XhoI</i> under the T7 promoter                        |
| <b>pACYC-trc</b>                  | <i>lacI</i> regulator, <i>trc</i> promoter and <i>rrnB</i> terminator were amplified together from pTrc99b and inserted into pACYC184 replacing <i>CmR</i> operon |
| <b>pACYC-trc-argW</b>             | insert <i>argW</i> after the <i>trc</i> promoter on pACYC-trc                                                                                                     |
| <b>pACYC-aspV</b>                 | <i>aspV</i> operon was amplified from the genome of <i>E.coli</i> and inserted into pACYC184 replacing the <i>CmR</i> operon                                      |
| <b>pACYC-T7-aspV</b>              | T7 promoter from pET28a was inserted into pACYC-aspV replacing a fragment of blank sequence                                                                       |
| <b>pACYC-T7-aspV(CCU)</b>         | mutated the anticodon part of <i>aspV</i> gene on pACYC-T7-aspV from GTC to CCT                                                                                   |
| <b>pACYC-T7-4AGGluc-aspV(CCU)</b> | luciferase gene with 4 AGG codons inserted after initial codon was inserted after T7 promoter on pACYC-T7-aspV(CCU)                                               |
| <b>pACYC-T7-6AGGRFP-aspV(CCU)</b> | RFP gene with 6 AGG codons inserted after initial codon was inserted after T7 promoter on pACYC-T7-aspV(CCU)                                                      |
| <b>pET-T7-TDRS</b>                | the truncated <i>aspRS</i> was amplified from the genome of <i>E.coli</i> and inserted after T7 promoter on pET28a using overlap extension PCR                    |
| <b>pET-T7-2AGGluc-argW</b>        | <i>argW</i> gene was amplified from <i>E.coli</i> genome and inserted after 2AGG-luc gene before T7 terminator on pET-T7-2AGGluc                                  |
| <b>pET-T7-4AGGluc-argW</b>        | <i>argW</i> gene was amplified from <i>E.coli</i> genome and inserted after 4AGG-luc gene before T7 terminator on pET-T7-4AGGluc                                  |
| <b>pET-T7-6AGGluc-argW</b>        | <i>argW</i> gene was amplified from <i>E.coli</i> genome and inserted after 6AGG-luc gene before T7 terminator on pET-T7-6AGGluc                                  |

---

**pET-T7-8AGGluc-argW** *argW* gene was amplified from *E.coli* genome and inserted after 8AGG-luc gene before T7 terminator on pET-T7-8AGGluc

---

### Supplementary Figure legends

**Fig. S1: Fatty acid metabolism pathway in *E. coli*.** FabA, FabB, FabD, FabF, FabG, FabH, FabI, FabZ are the main enzymes of the fatty acid biosynthesis pathway in *E.coli*. FabB, FabF, Fab G, FabI, FabZ/FabA are mainly responsible for fatty acid elongation. TesA is the enzyme that is able to release free fatty acid by hydrolysis of acyl-ACP species. FabG, FabZ, FabI and TesA were picked as targets for manipulation in these experiments based on previous studies.

**Fig. S2: RFP expression controlled by rare codon devices.** (A) Constructs for testing rare codon devices. RFP containing 6 AGGs and tRNA<sup>Arg</sup> (CCU) were expressed under separate T7 promoters (blue). (B) Cells containing *rfp* without the rare AGG codon and tRNA<sup>Arg</sup> (CCU) expressed RFP (upper row). RFP expression nearly ceased upon insertion of 6 AGG codons (S2A) (middle row). RFP expression was restored in cells containing pACYC-trc-argW (coded for tRNA<sup>Arg</sup> (CCU)) (bottom row). (C-I) Time-course assays of luciferase activity. Black line indicates luciferase activity in the cell carrying pET-T7-nAGGluc and pACYC-trc-argW (C-F, n = 2, 4, 6, 8) or pET-bla-nAGGluc and pACYC-trc-argW (G-I, n = 4, 6, 8). Red line indicates luciferase activity in the cell carrying pET-T7-nAGGluc (C-F, n = 2, 4, 6, 8) or pET-bla-nAGGluc (G-I, n = 4, 6, 8).

**Fig S3: Protein levels of luciferase with various numbers of rare AGG codon insertions after the start codon.** (A) SDS-PAGE of lysates of cells containing rare codon devices

shown in Fig. 1A. The upper bands (nAGGLuc) represent luciferase with various numbers of arginines at the N terminus. The lower bands are western blots of DnaK protein, which was chosen as the internal control. **(B)** The bands in Fig. S3A were quantified in terms of relative protein amounts using Quantity One® software.

**Fig. S4: Control of luciferase expression via TDRS and mutated tRNA<sup>Asp</sup> (GUC→CCU).**

**(A)** Sketch showing TDRS and mutated tRNA<sup>Asp</sup> (GUC→CCU). **(B)** Luciferase activity was detected only in the cell carrying plasmids containing *luciferase* with 4 AGG codon insertions, mutated tRNA<sup>Asp</sup> (GUC→CCU), and TDRS (right-hand column). Only the luciferase substrate (considered as background) was detected from the cell containing *luciferase* with 4 AGG codon insertions and mutated tRNA<sup>Asp</sup> (GUC→CCU) (left-hand column).

**Fig. S5: Control of kanamycin resistance gene expression using truncated MetRS and**

**tRNA<sup>fMet</sup> (CAT→TCG).** **(A)** Sketch of the test system. The start codon of *KanR* was mutated to CGA to permit recognition by tRNA<sup>fMet</sup> (CAT→TCG). The tRNA<sup>fMet</sup> (CAT→TCG) was charged using truncated MetRS. **(B)** Expression of *KanR* (ATG→CGA) was controlled by truncated MetRS and tRNA<sup>fMet</sup> (CAT→TCG). The left-hand figure shows a cell carrying truncated MetRS, tRNA<sup>fMet</sup> (CAT→TCG), and *KanR* (ATG→CGA) grown on a plate containing kanamycin. The cell that carried only tRNA<sup>fMet</sup> (CAT→TCG) and *KanR* (ATG→CGA) could not grow on the kanamycin plate showed in the right-hand figure. "N" and "M" indicate two independent clones.

**Fig. S6: Component analysis of fatty acid products by GC-MS.** Data for the strains (A) ZGIT, (B) 4Z4G4I4T, and (C) 4Z8G4I1T. The X-axis and Y-axis represent retention time and relative amounts, respectively.

**Fig. S7: Analysis of the structures of aminoacyl-tRNA synthetases complexed with cognate tRNAs.** Black arrows indicate the anticodon recognition domains of various aminoacyl-tRNA synthetases. Figures on the left depict natural aminoacyl-tRNA synthetases complexed with cognate tRNAs, while those on the right represent hypothesized truncated aminoacyl-tRNA synthetases without the anticodon recognition domain. (A) Arginyl-tRNA synthetase, (B) cysteinyl-tRNA synthetase, (C) glutaminyl-tRNA synthetase, (D) glutamyl-trna synthetase, (E) threonyl-tRNA synthetase, (F) tryptophanyl-tRNA, (G) tyrosyl-tRNA synthetase, and (H) methionyl-tRNA synthetase.

Fig. S1

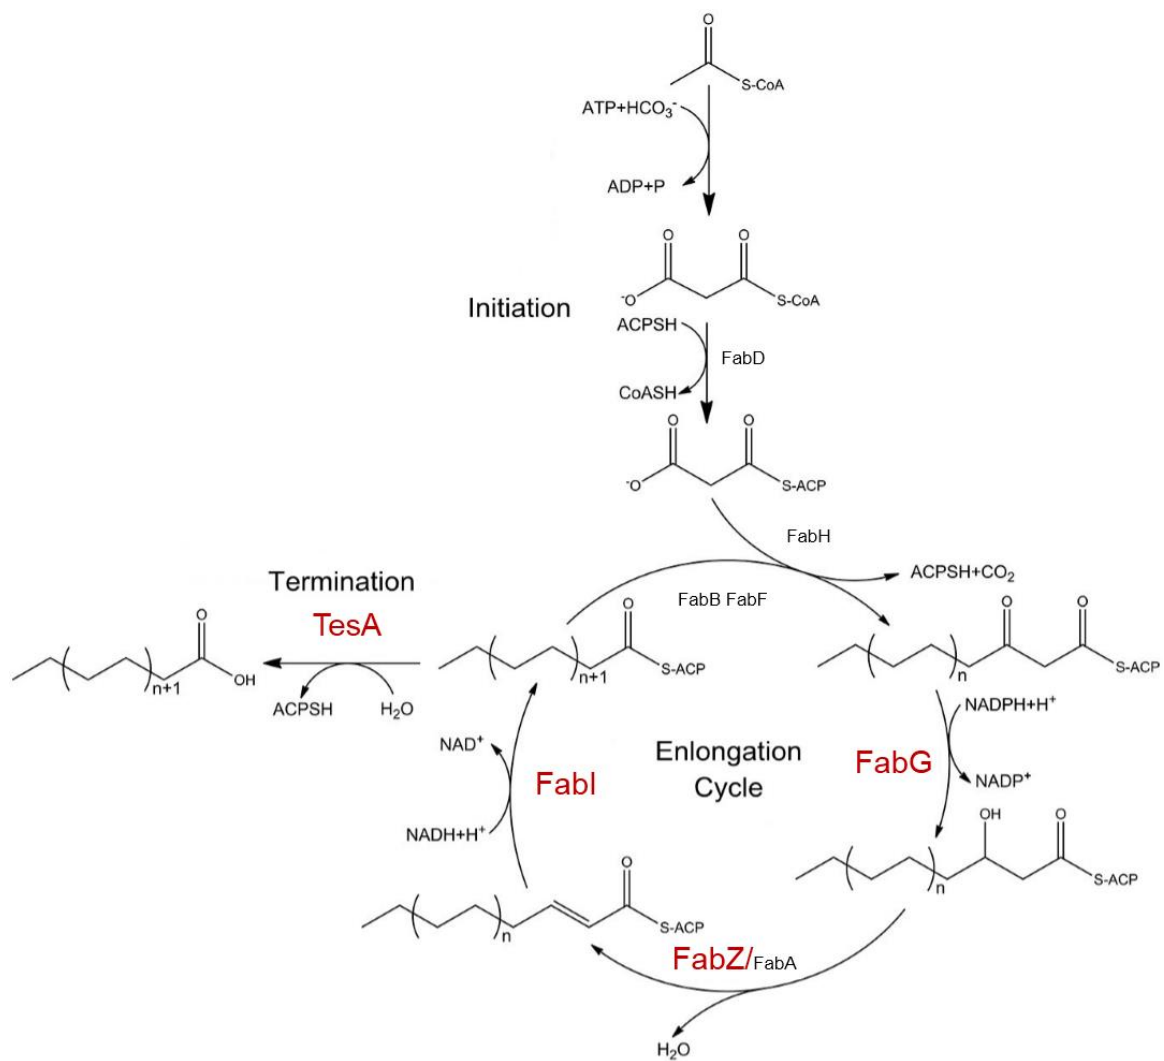

Fig. S2A

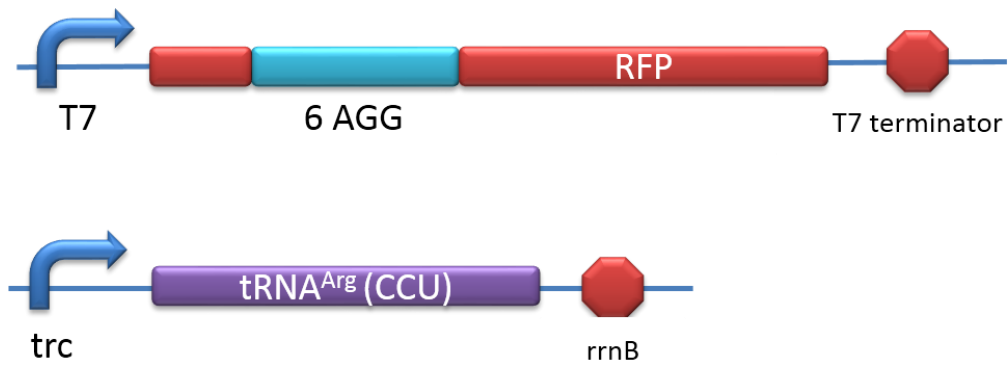

Fig. S2B

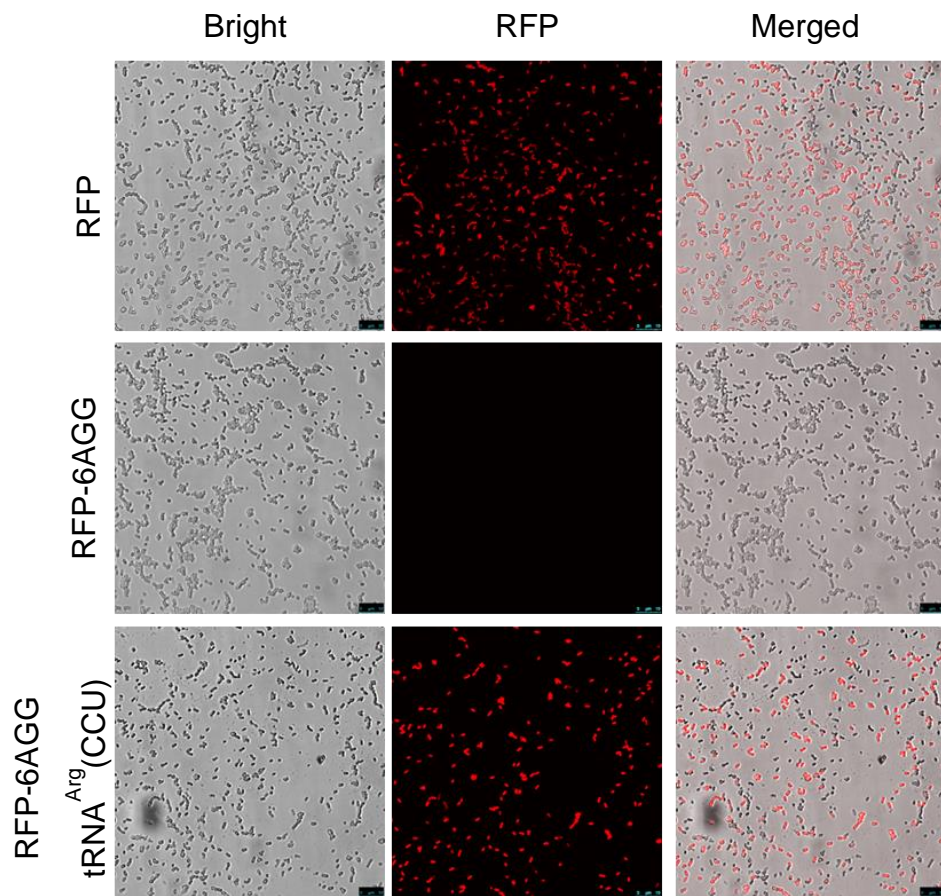



Fig. S2C

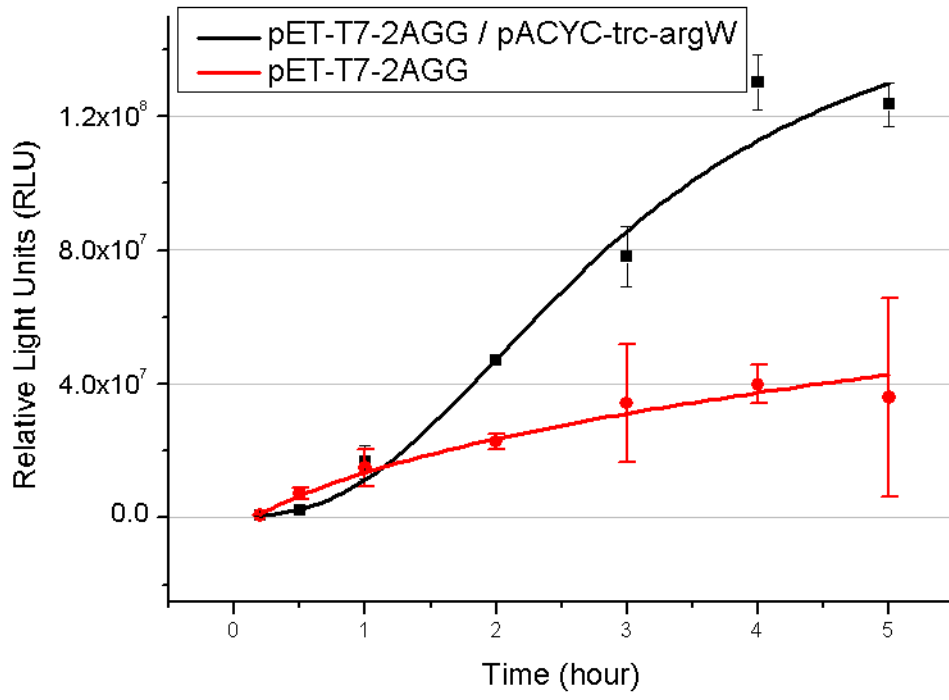

Fig. S2D

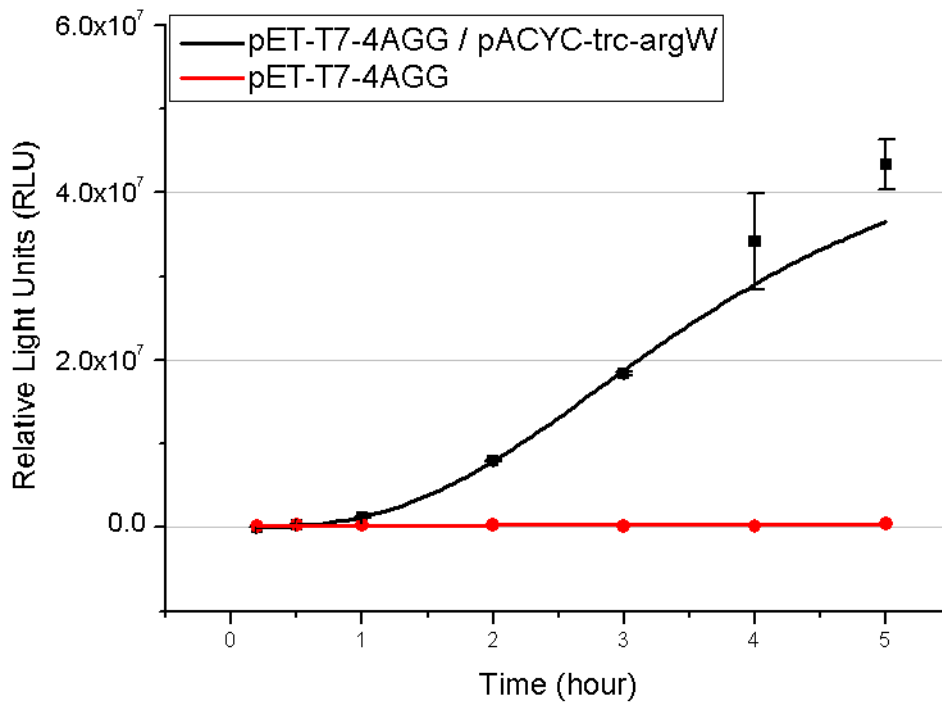

Fig. S2E

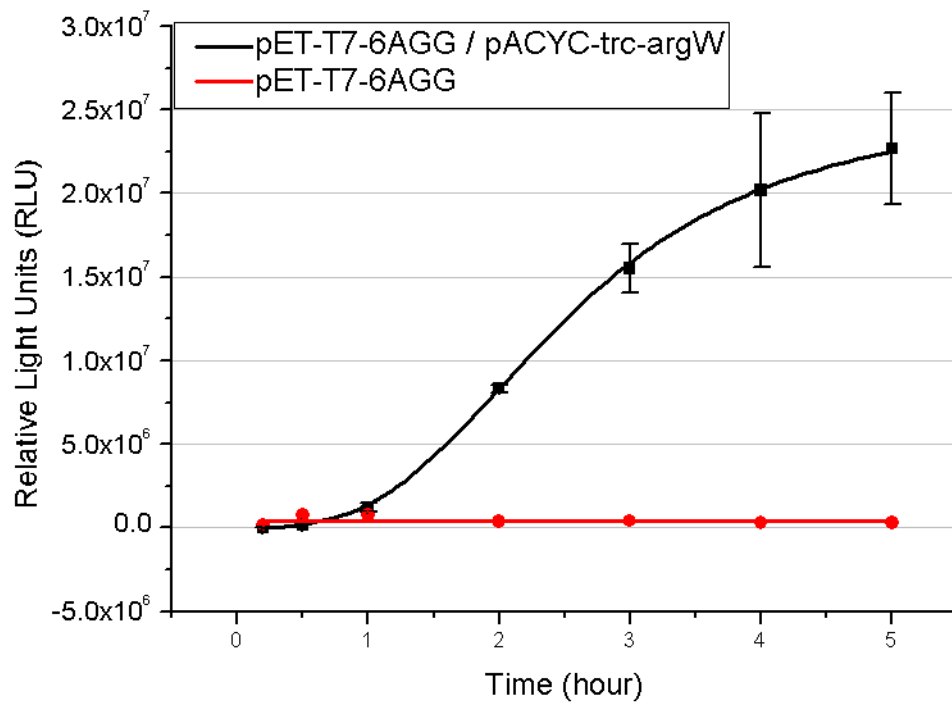

Fig. S2F

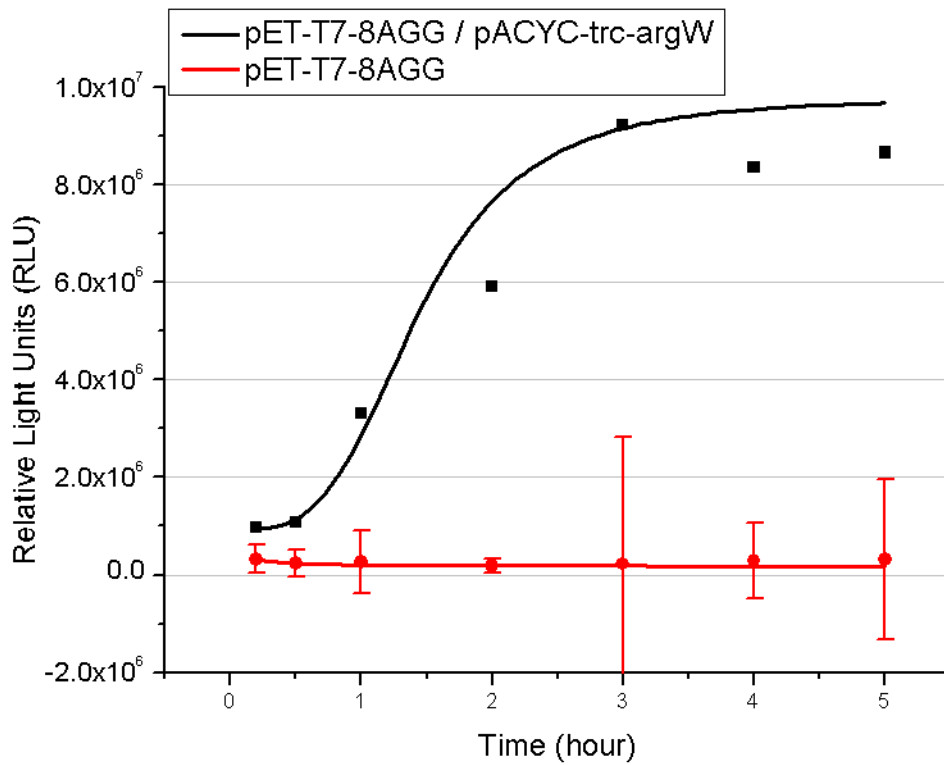

Fig. S2G

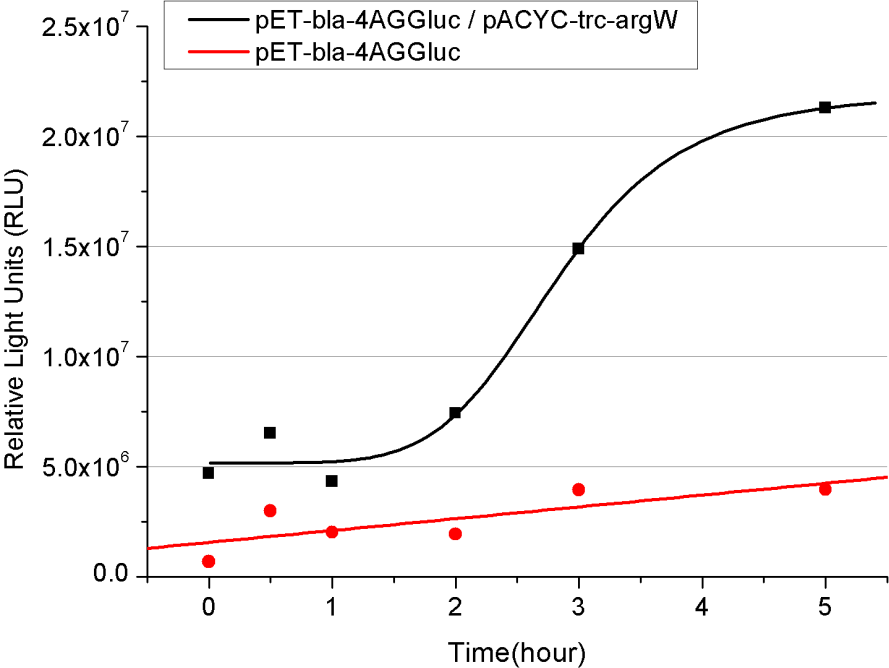

Fig. S2H

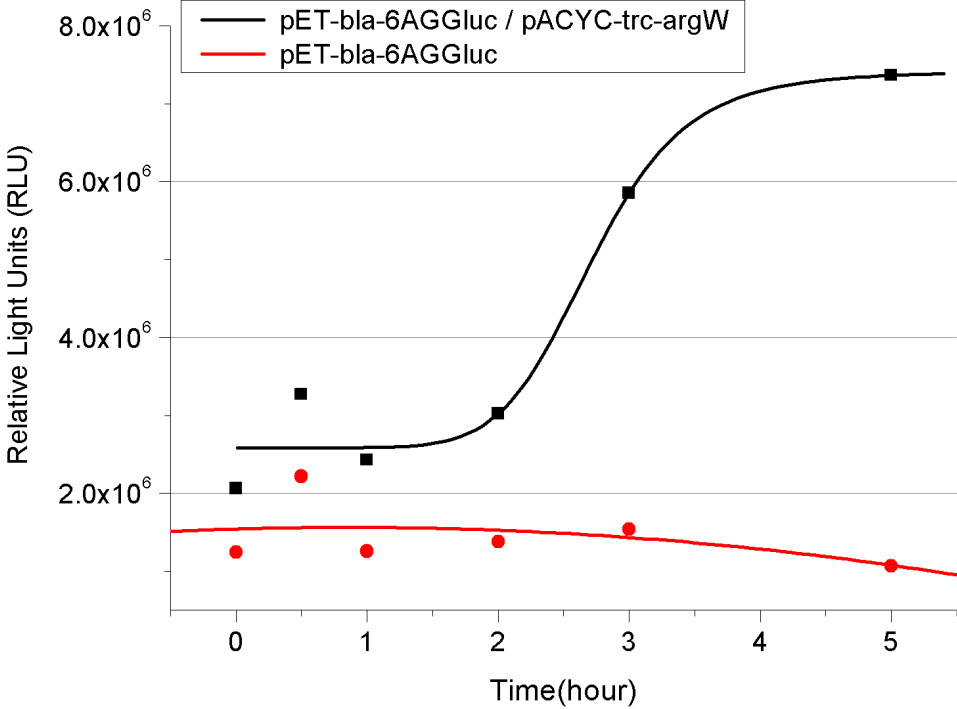

Fig. S2I

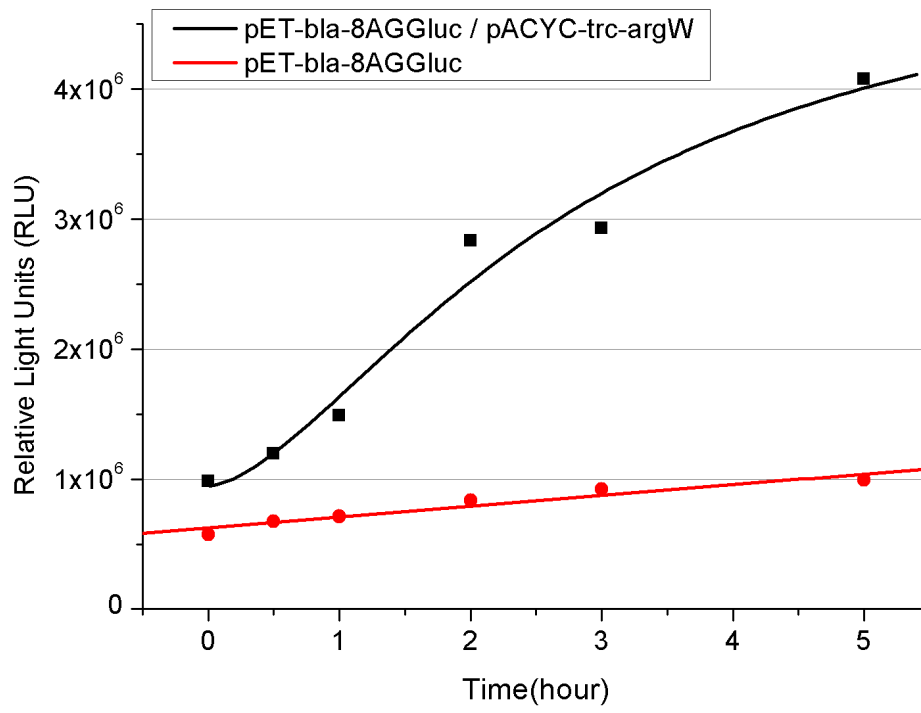

Fig. S3A

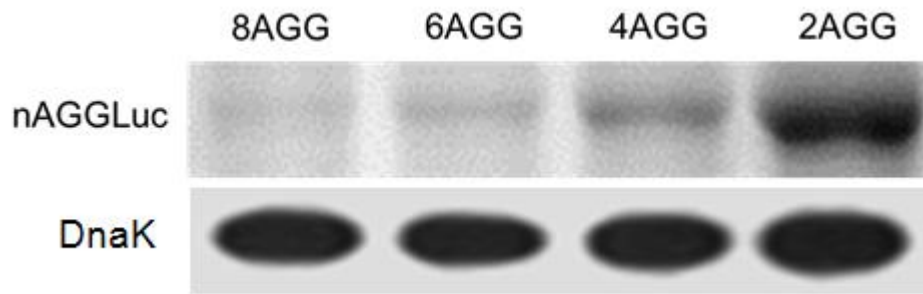

Fig. S3B

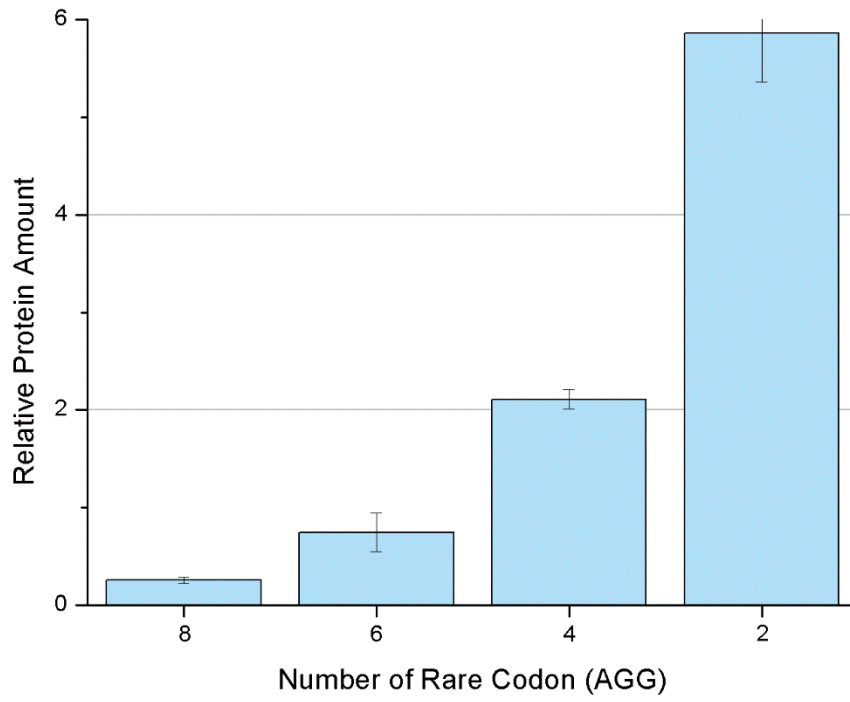

Fig. S4A

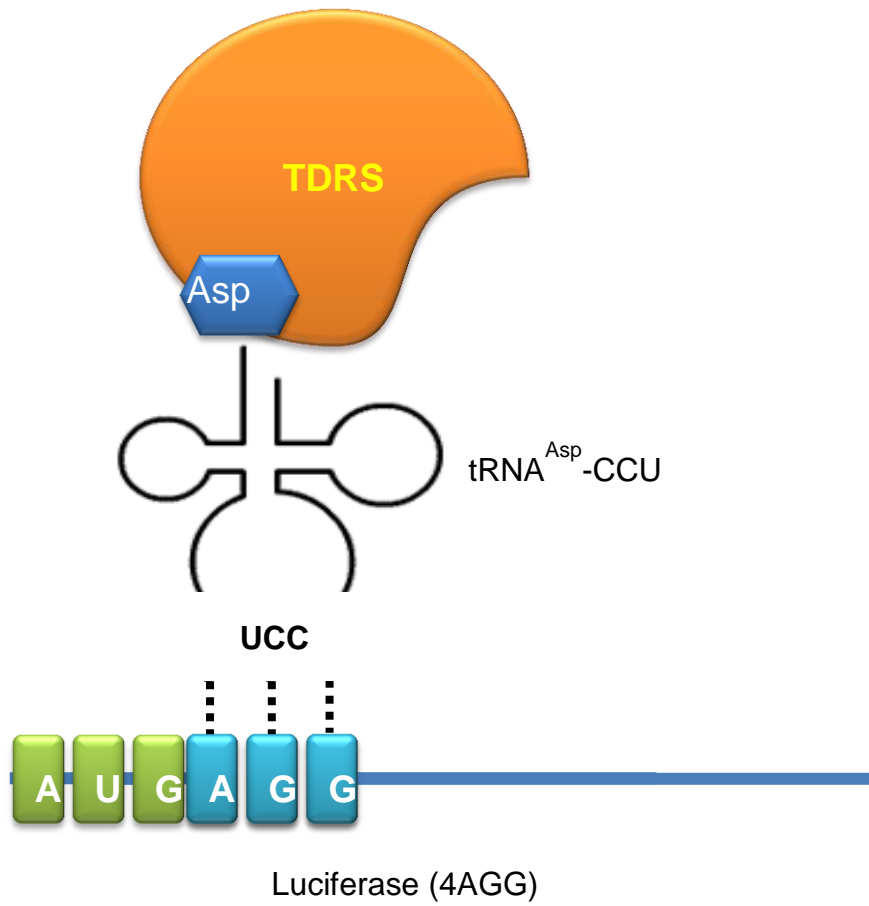

Fig. S4B

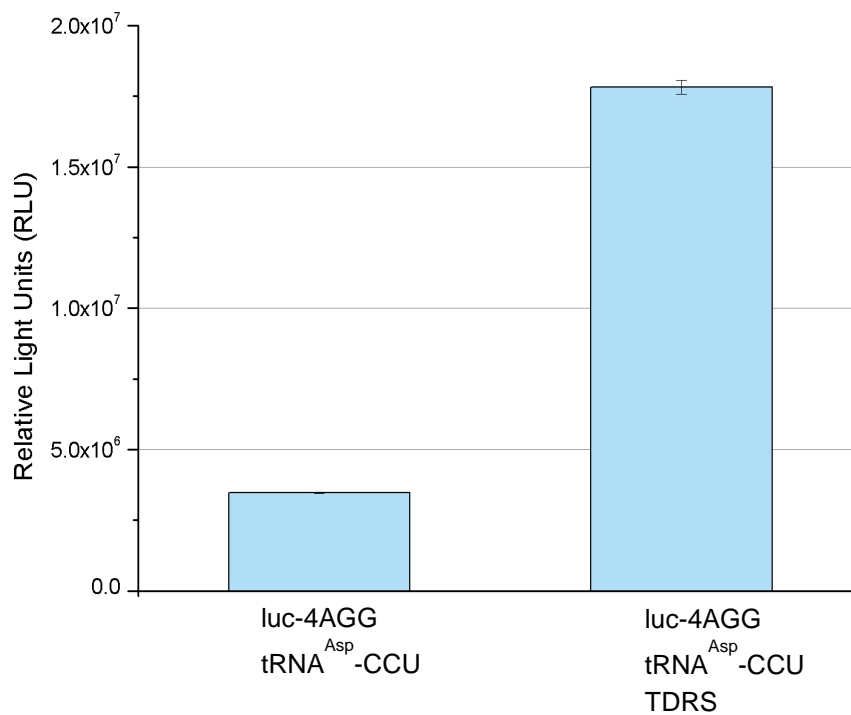

Fig. S5A

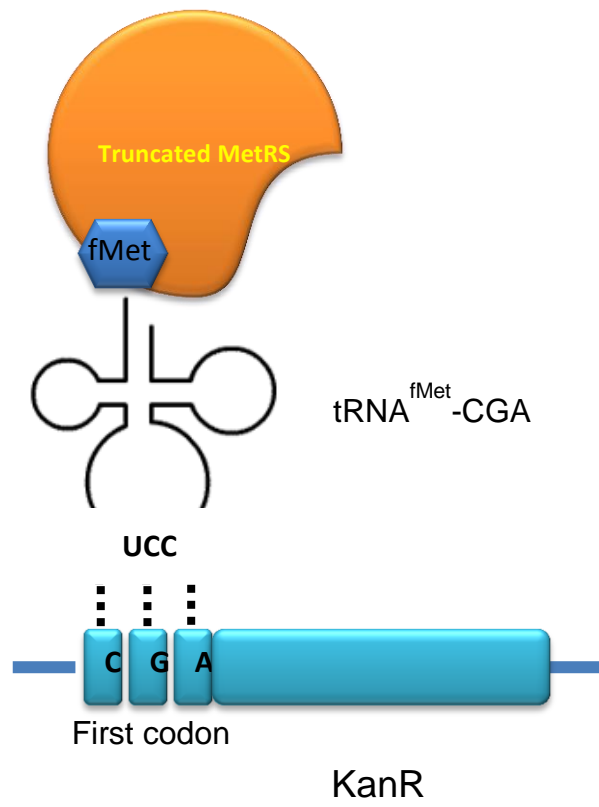

Fig. S5B

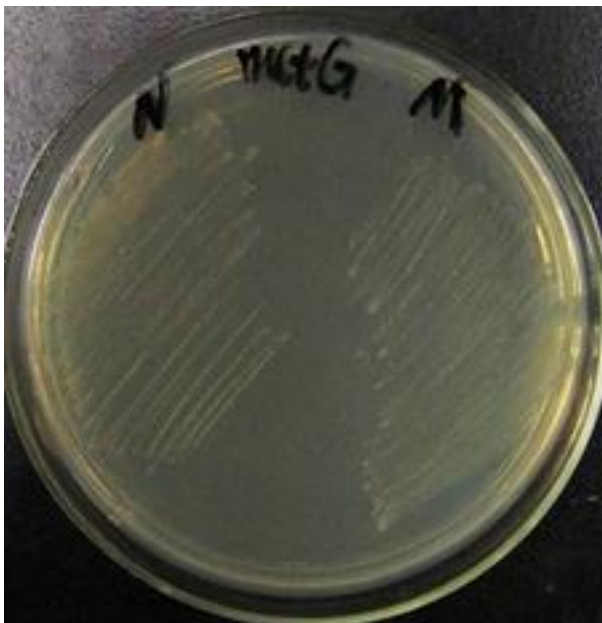

Truncated MetRS  
tRNA<sup>fMet</sup> (CAT→TCG)  
KanR (ATG→CGA)

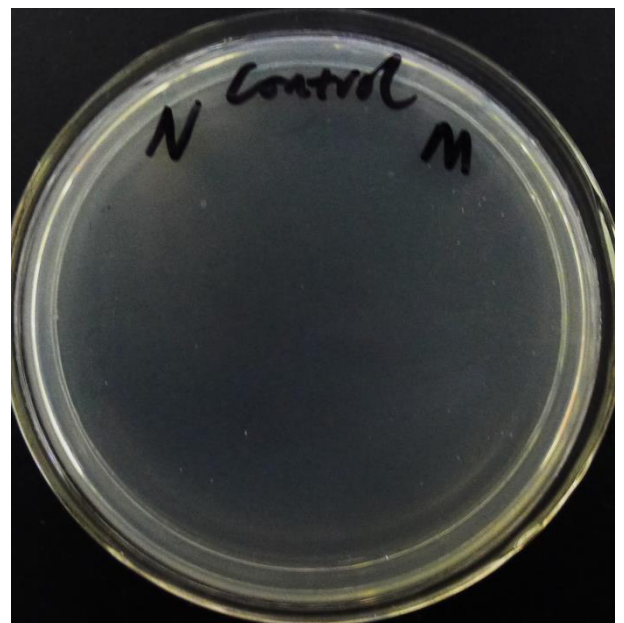

tRNA<sup>fMet</sup> (CAT→TCG)  
KanR (ATG→CGA)

Fig. S6A

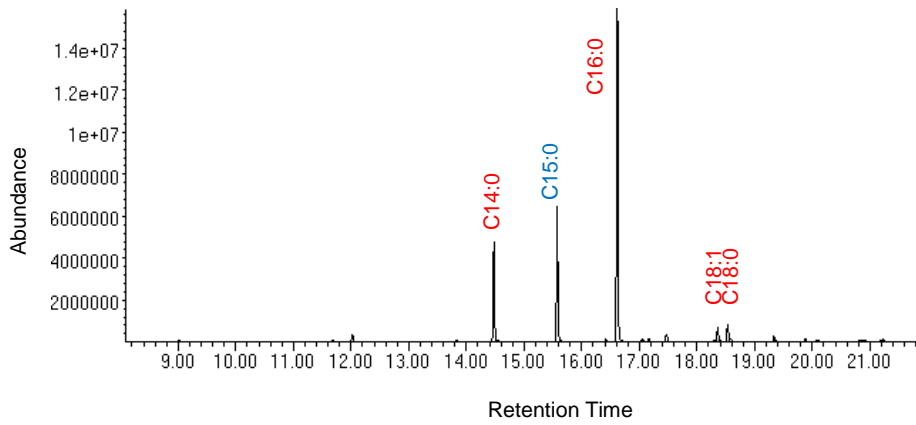

Fig. S6B

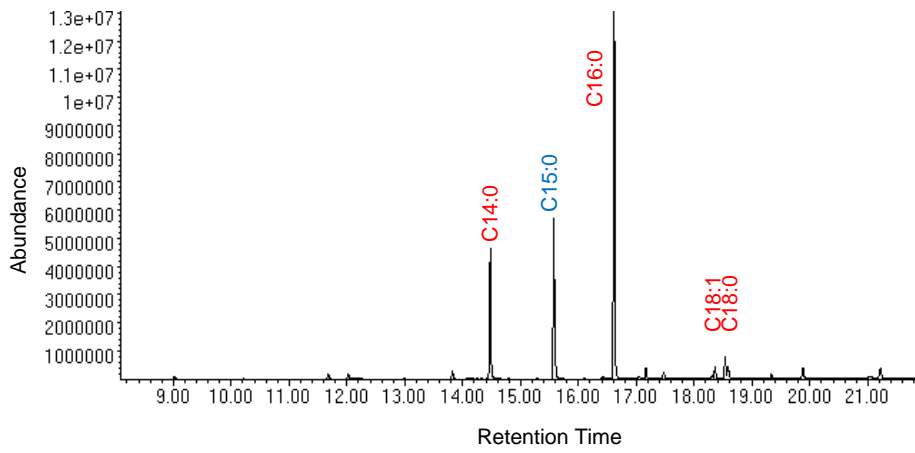

Fig. S6C

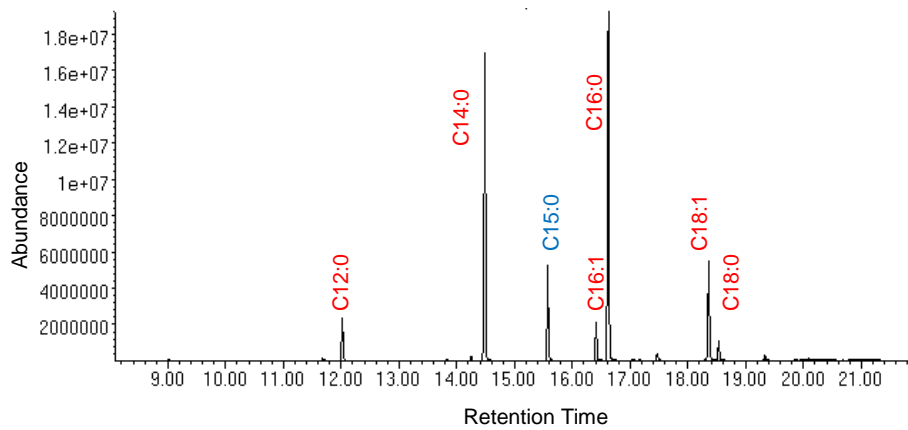



Fig. S7A

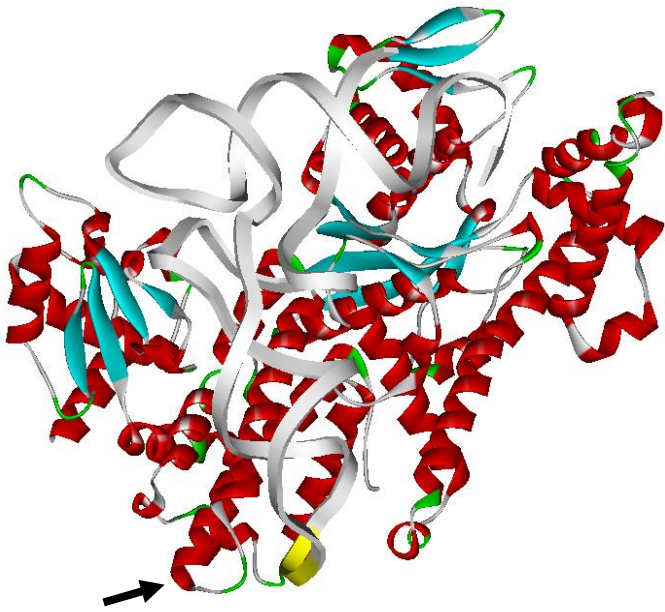

Arginyl-tRNA synthetase

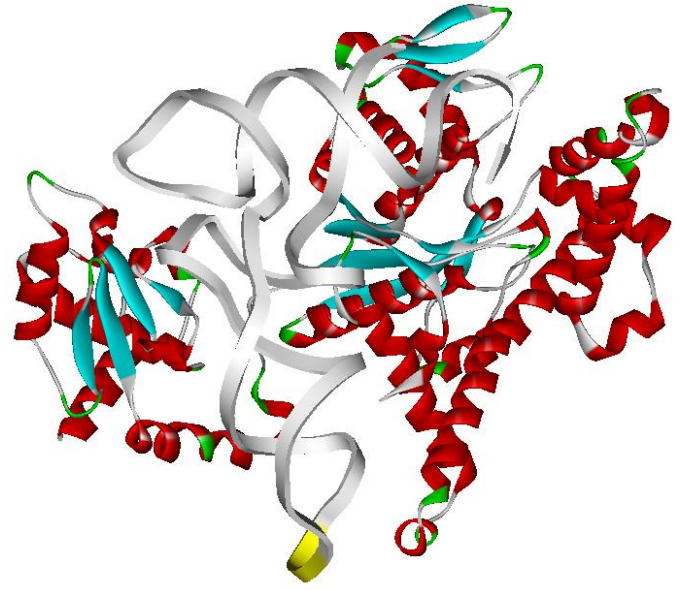

Truncated Arginyl-tRNA synthetase  
(anticodon recognition domain deletion (483-607))

Fig. S7B

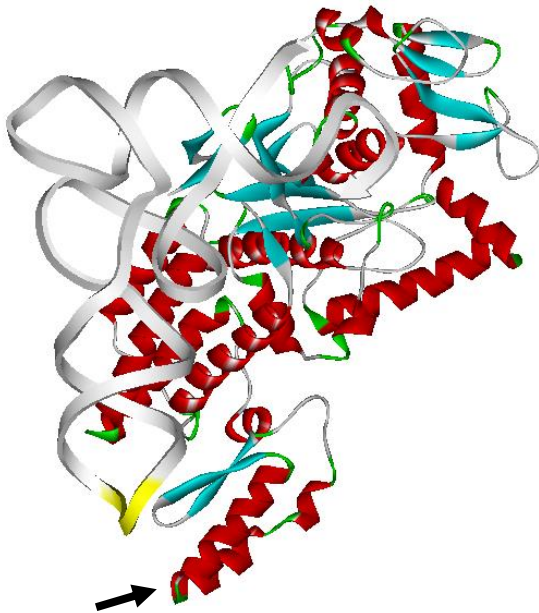

Cysteinyl-tRNA synthetase

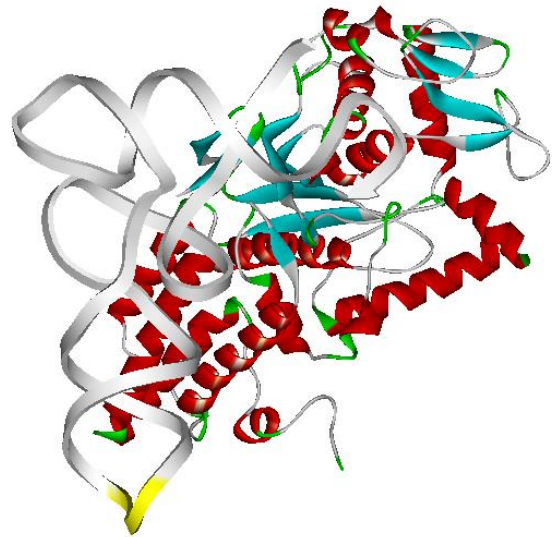

Truncated Cysteinyl-tRNA synthetase  
(anticodon recognition domain deletion (413-461))

Fig. S7C

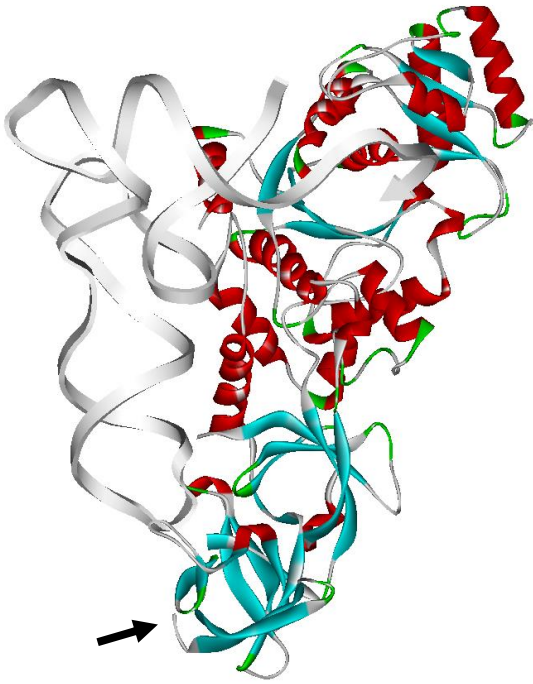

Glutamyl-tRNA synthetase (PDB 1G59)

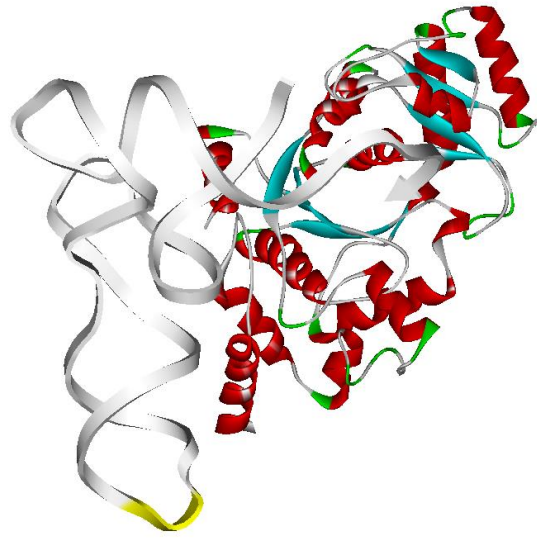

Truncated Glutamyl-tRNA synthetase  
(anticodon recognition domain deletion (340-547))

Fig. S7D

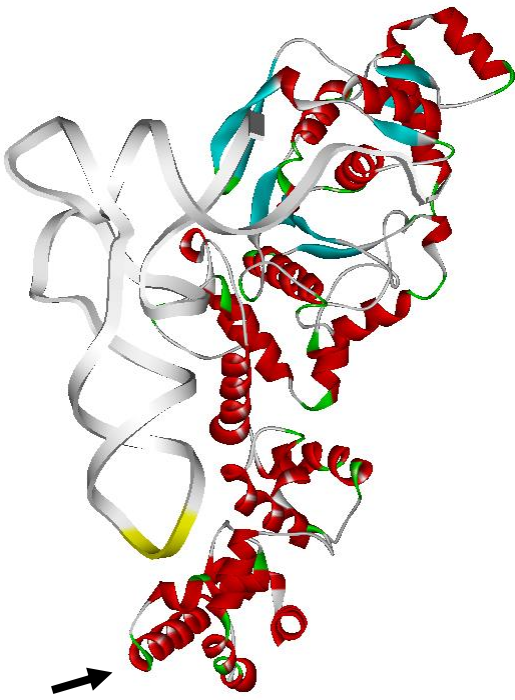

Glutamyl-tRNA synthetase (PDB 1G59)

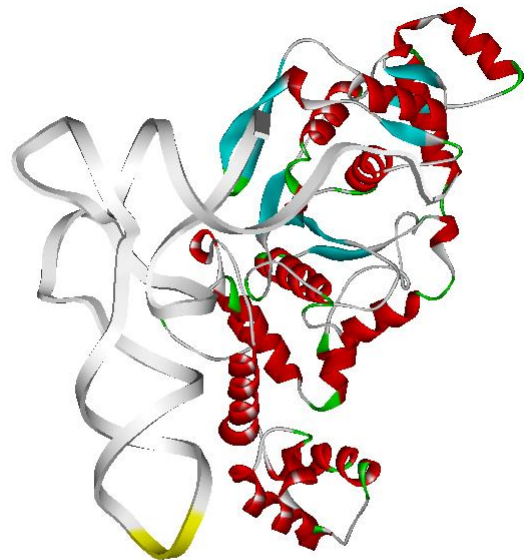

Truncated Glutamyl-tRNA synthetase  
(anticodon recognition domain deletion (375-468))

Fig. S7E

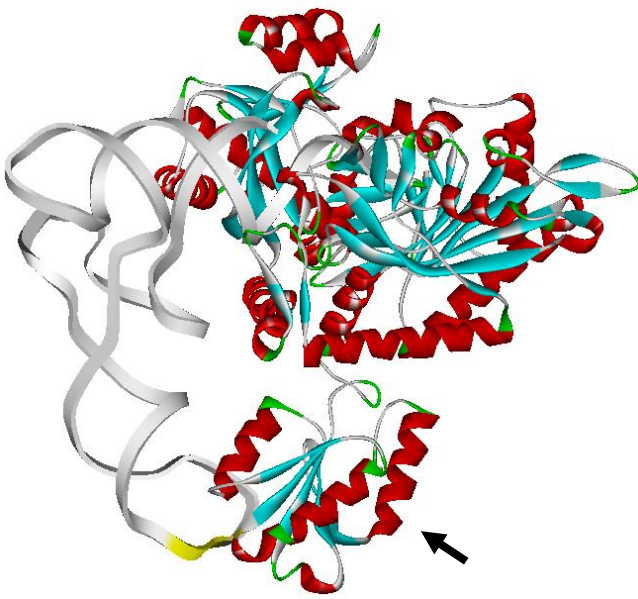

Threonyl-tRNA synthetase (PDB 1QF6)

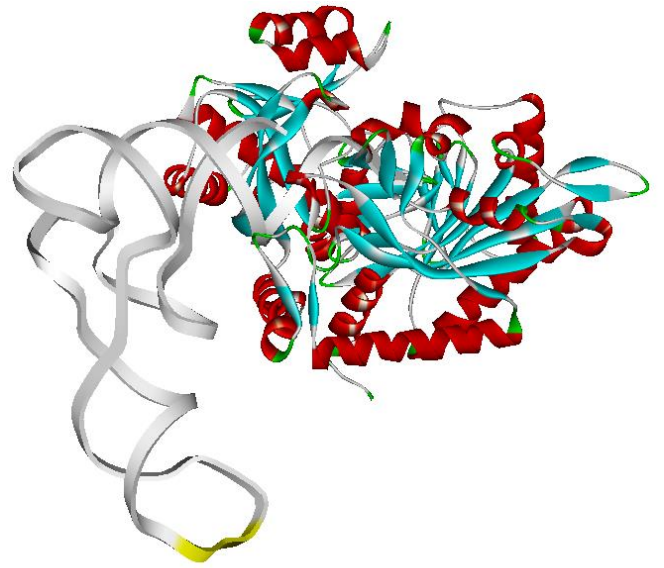

Truncated Threonyl-tRNA synthetase  
(anticodon recognition domain deletion (536-642))

Fig. S7F

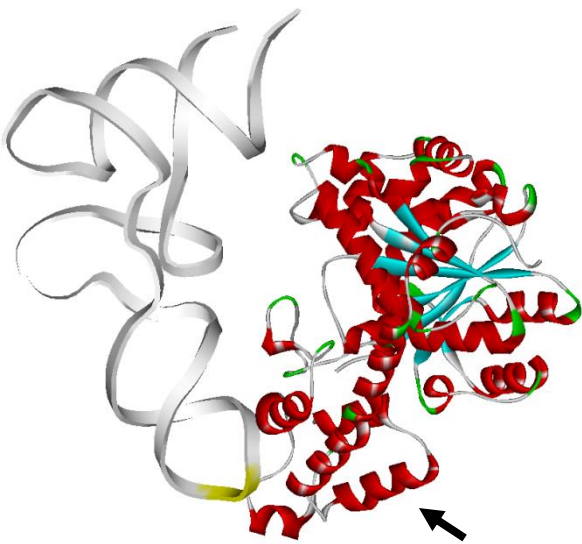

Tryptophanyl-tRNA synthetase (PDB  
2AKE)

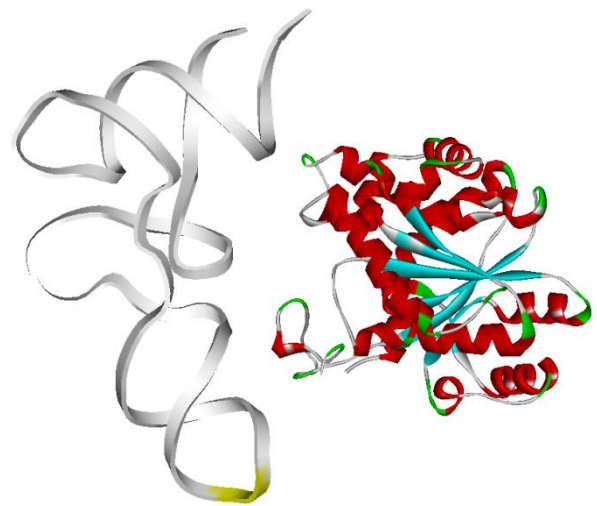

Truncated Tryptophanyl-tRNA synthetase  
(anticodon recognition domain deletion (365-469))



Fig. S7G

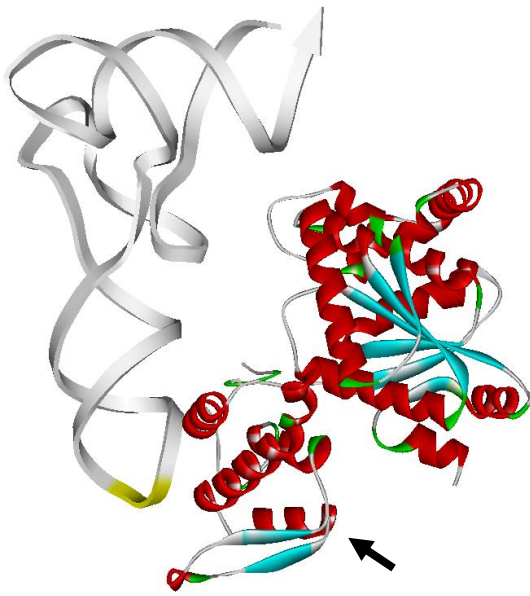

Tyrosyl-tRNA synthetase (PDB 1J1U)

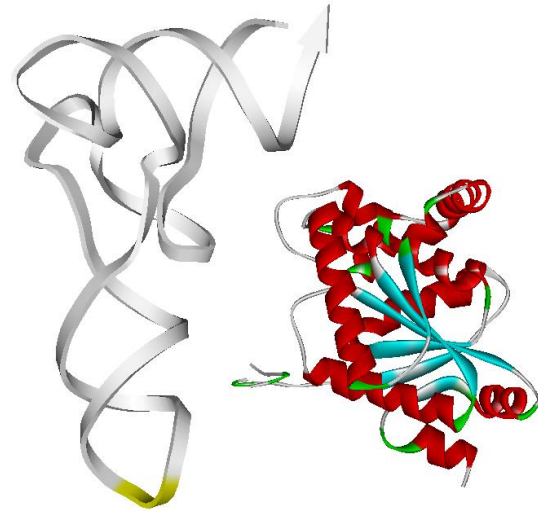

Truncated Tyrosyl-tRNA synthetase  
(anticodon recognition domain deletion (219-306))

Fig. S7H

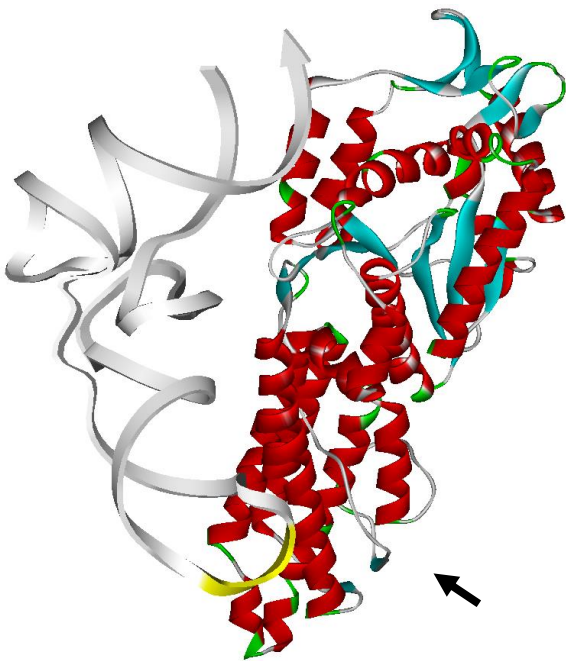

Methionyl-tRNA synthetase (PDB 2CSX)

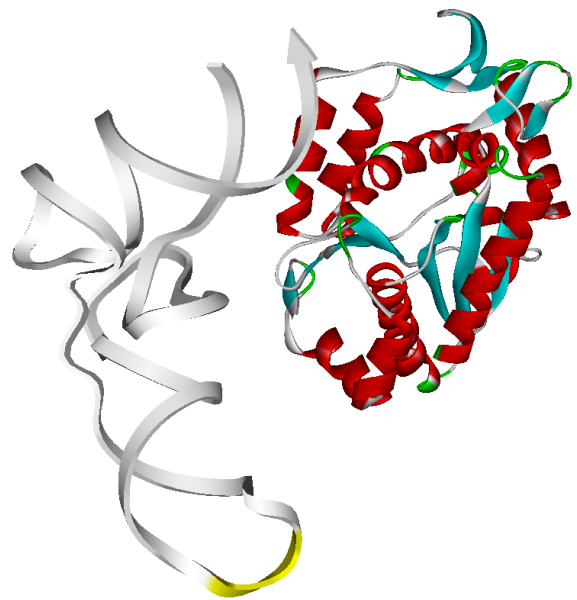

Truncated Methionyl-tRNA synthetase  
(anticodon recognition domain deletion (336-497))
